# Supplementary material for: Plasmon-mediated nonradiative energy transfer from a conjugated polymer to a plane of graphene-nanodot-supported silver nanoparticles: an insight into characteristic distance
Source: Royal Society of Chemistry journal article supplement (doi:10.1039/c8nr09576k), 2019-01-01
Supplement: c8nr09576k1.pdf [file c8nr09576k1.pdf]

Supplementary Information

# Plasmon-Mediated Nonradiative Energy Transfer from Conjugated Polymer to a Plane of Graphene-Nanodot-Supported Silver Nanoparticles: An Insight into Characteristic Distance

Yunjing Wang,<sup>§a</sup> Hanmei Li,<sup>§a</sup> Weiwei Zhu,<sup>a</sup> Futao He,<sup>a</sup> Yongwei Huang,<sup>b</sup> Ruifeng Chong,<sup>a</sup> Dongxing Kou,<sup>a</sup> Wenkai Zhang,<sup>\*a</sup> Xianrui Meng,<sup>\*a</sup> Xiaomin Fang<sup>\*a</sup>

<sup>a</sup>Institute of Fine Chemistry and Engineering, Henan Engineering Laboratory of Flame-Retardant and Functional Materials, College of Chemistry and Chemical Engineering, Henan University, Kaifeng 475004, P. R. China.

<sup>b</sup>Laboratory of Nanomedicine, School of Basic Medical Science, Henan University, Kaifeng 475004, China

<sup>§</sup>These authors contributed equally to this work.

<sup>\*</sup>Dr. Wenkai Zhang, E-mail: zhangwenkai@henu.edu.cn

<sup>\*</sup>Prof. Xianrui Meng, E-mail: mengxianrui@henu.edu.cn

<sup>\*</sup>Prof. Xiaomin Fang, E-mail: xmfang@henu.edu.cn

## Monitoring the growth of Ag NPs by LSPR spectra

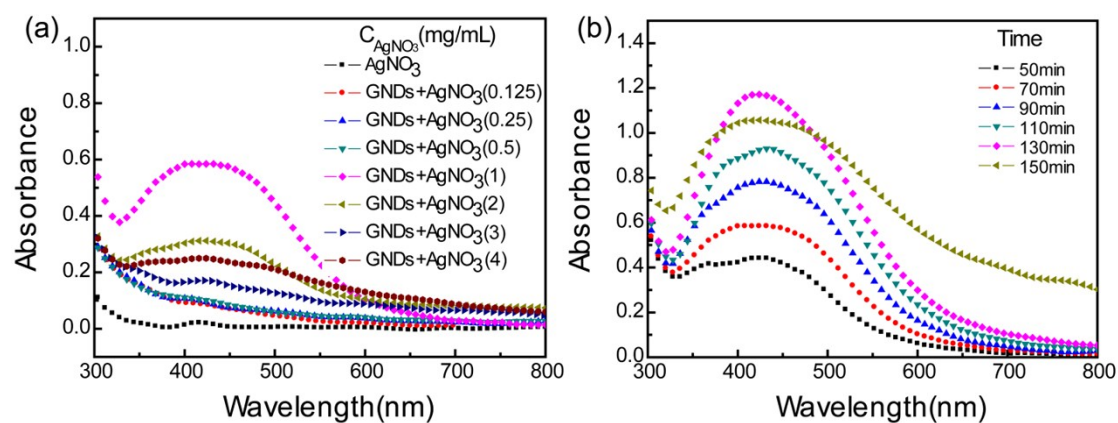

**Figure S1** LSPR spectra of GND-supported Ag NPs as a function of precursor  $\text{AgNO}_3$  concentration (a) and irradiation time (b). The intensity of LSPR peak increases but show little shift with the irradiation time, indicating the increasing number of Ag NPs during photoreduction, instead of particle size.

## The effect of GND template on the loaded Ag NPs

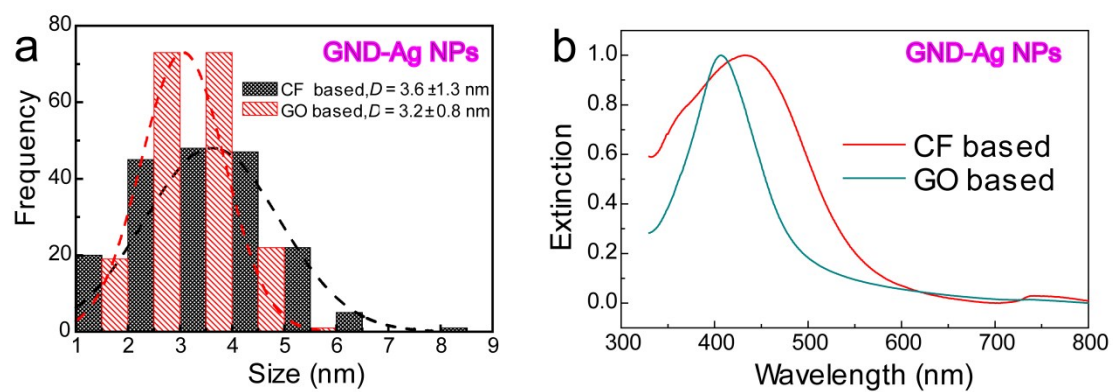

**Figure S2** (a) The TEM size histogram of GND-Ag NPs. GNDs are synthesized by using carbon fiber (black) and GO (red) as starting materials. The mean values and standard deviations are shown inset. (b) LSPR spectra of GND-Ag NP solution. GND types: carbon fiber based (red); GO (cyan) based.

### Estimation of surface density of deposited GND-Ag NPs

A direct method for calculating the surface concentration,  $\Gamma$  (particles $\cdot$ cm $^{-2}$ ), is to measure the number of GND-Ag NPs ( $N$ ) present on a quartz substrate of known surface area ( $SA$ ). We assume the GND-Ag NPs form a tightly packed well-ordered monolayer on quartz substrate, and then the surface density is defined as:

$$\Gamma (\text{particles} \cdot \text{cm}^{-2}) = \frac{N(\text{particles})}{SA(\text{cm}^2)} \quad (1)$$

with the substrate surface area,  $SA$ , equal to 4.909 cm $^2$  (2.5 cm diameter quartz). In addition, the measurable mass of deposited GNDs-Ag NPs, is considered as the product of the mass of single particle,  $m_0$ , and the particle numbers,  $N$ :

$$m = N \cdot m_0 \quad (2)$$

The GNDs-Ag nanoparticle is briefly treated as quasi-sphere with a radius ( $r_{Ag}$ ) of 1.6 nm and specific gravity ( $\rho_{Ag}$ ) of 10.5 g $\cdot$ cm $^{-3}$ . Then the eq(2) can be written as:

$$m = N \cdot \rho_{Ag} \cdot \frac{4}{3}\pi r_{Ag}^3 = \gamma_i \cdot V \quad (3)$$

where  $\gamma_i$  is the mass concentration and the  $V$  is the pipetted volume of the GND-Ag NP solution. During the casting process, the  $\gamma_i$  in the range of 4-50  $\mu\text{g}\cdot\text{mL}^{-1}$ , and the  $V$  is 300  $\mu\text{L}$ . Finally, the surface density can be determined as:

$$\Gamma (\text{particles} \cdot \text{nm}^{-2}) = 8.893 \times 10^{10} \gamma_i \quad (4)$$

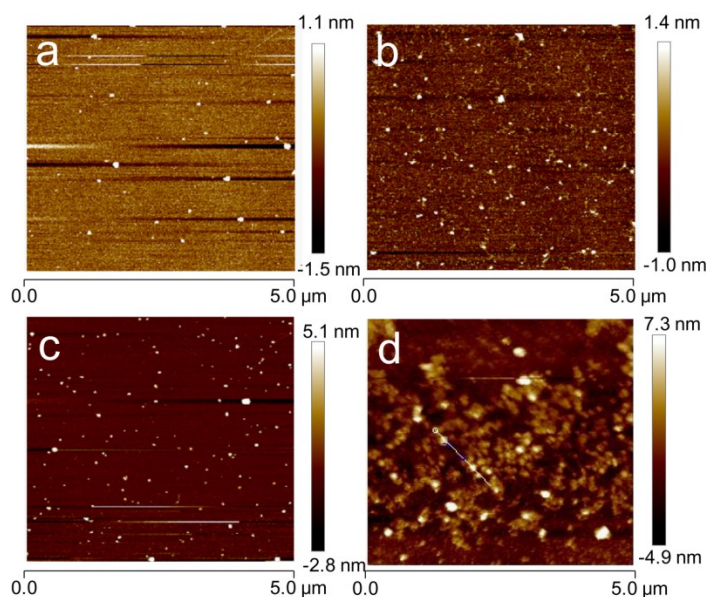

**Figure S3** The AFM images of GND-Ag NPs on quartz when casting from increasing concentration of solution. (a) 4  $\mu\text{g}/\text{mL}$ ; (b) 8  $\mu\text{g}/\text{mL}$ ; (c) 12  $\mu\text{g}/\text{mL}$ ; (d) 50  $\mu\text{g}/\text{mL}$ .

## PL quenching of GNDs by the loaded Ag NPs

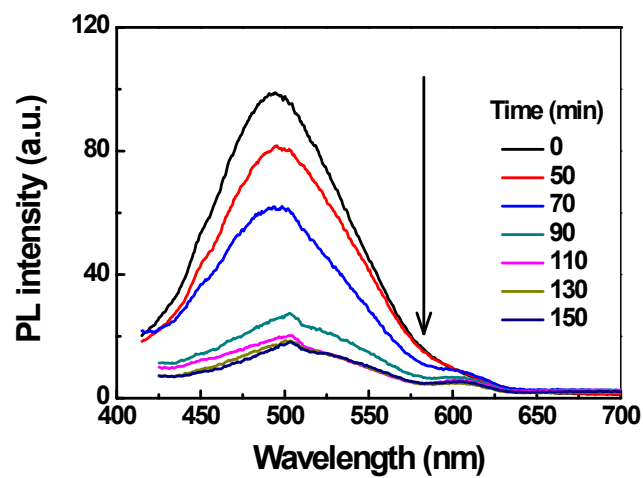

**Figure S4** PL spectra of the GNDs and AgNO<sub>3</sub> mixture at increasing irradiating time, indicating the growing Ag loadings induce increasing PL quenching of the GNDs. The concentrations of GNDs and AgNO<sub>3</sub> solution are 0.1 mg/mL and 1 mg/mL, respectively. 254 nm UV lamp (8 W) was adopted.

### Morphologies of spun CP films

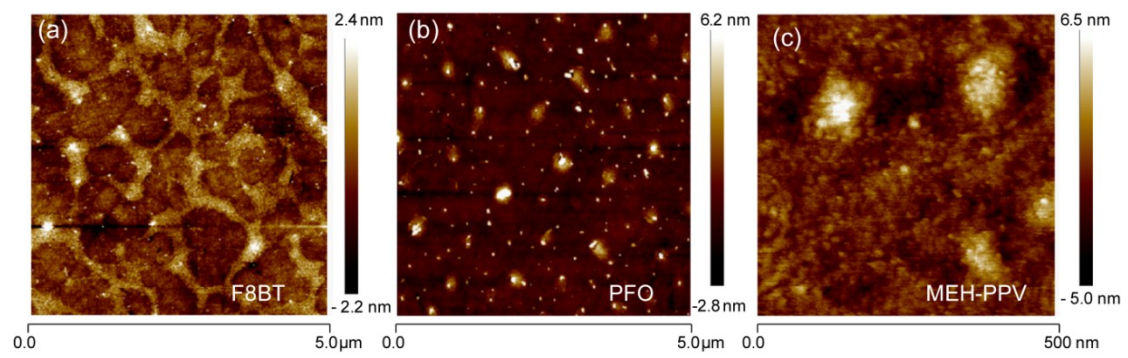

**Figure S5** AFM images of the surface morphologies of spun CP films on quartz. (a) F8BT; (b) PFO; (c) MEH-PPV.

## GND-Ag NP surface density dependent PL spectra

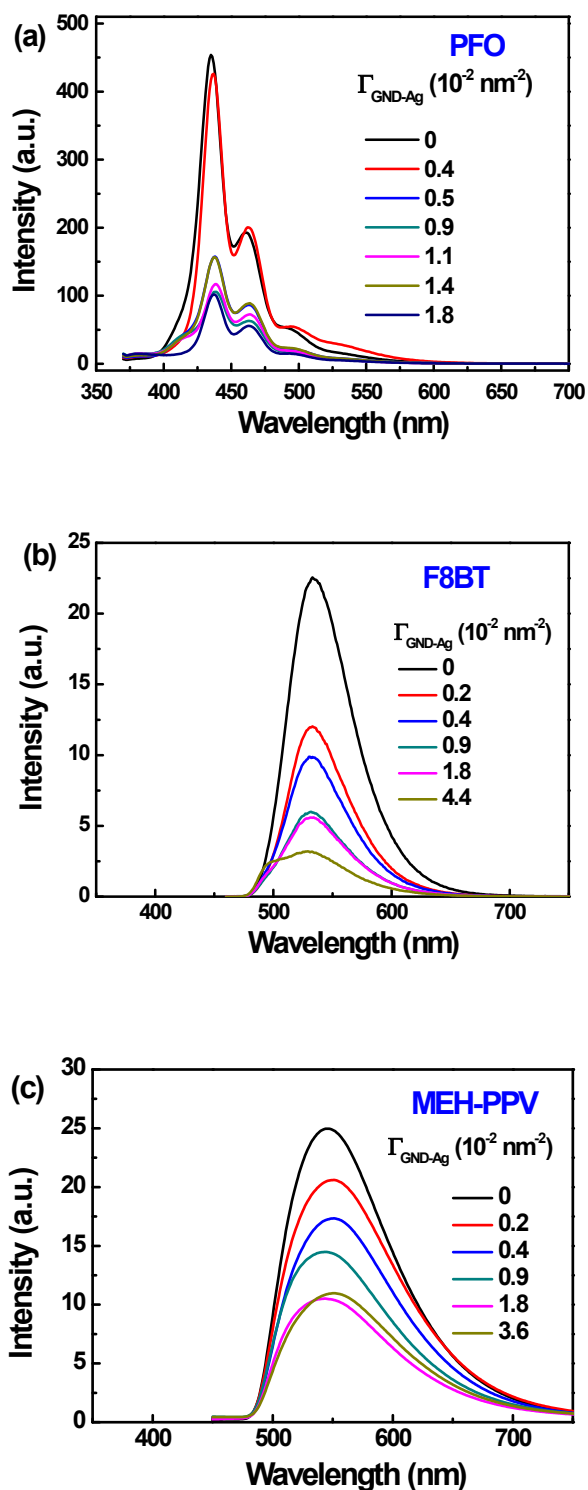

**Figure S6** Steady PL spectra of CP films spun on top of GND-Ag NP monolayer with various surface densities of GND-Ag NPs,  $\Gamma_{\text{GND-Ag}}$ . (a) PFO,  $\lambda_{\text{ex}} = 350 \text{ nm}$ ; (b) F8BT,  $\lambda_{\text{ex}} = 420 \text{ nm}$ ; (c) MEH-PPV,  $\lambda_{\text{ex}} = 420 \text{ nm}$ .

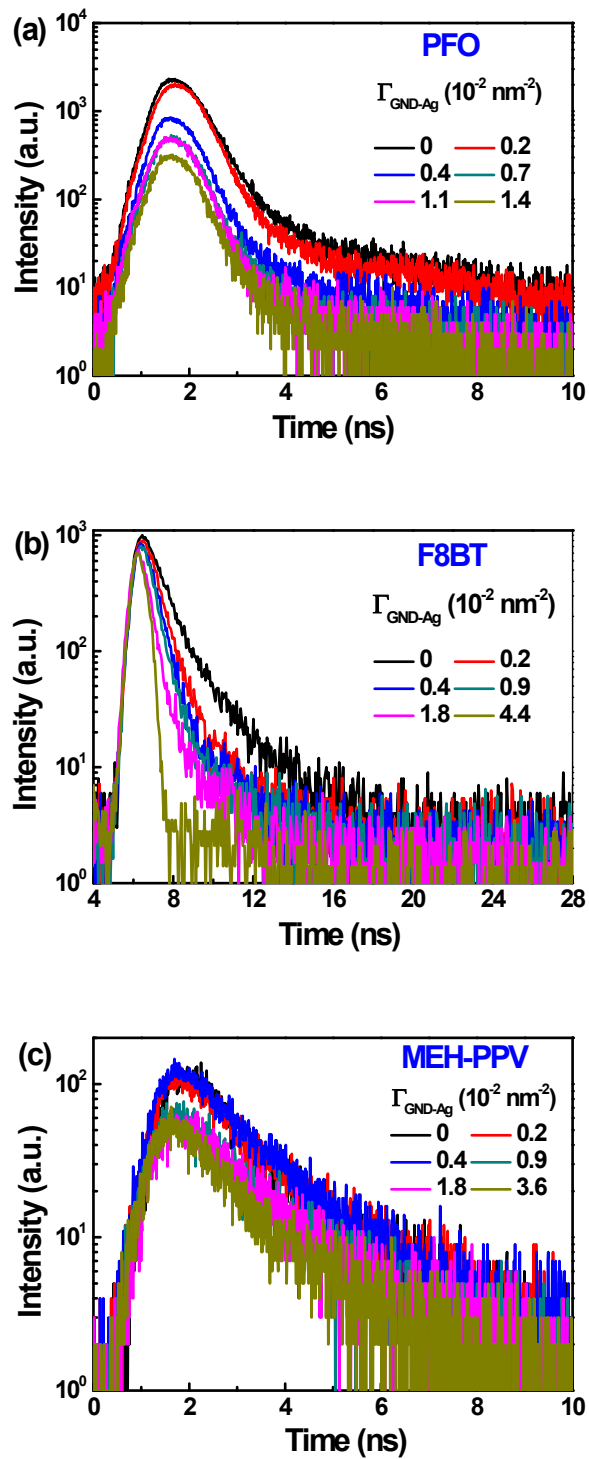

**Figure S7** Transient PL decay curves of CP films spun on top of GND-Ag NP monolayer with various surface densities of GND-Ag NPs,  $\Gamma_{\text{GND-Ag}}$ . (a) PFO,  $\lambda_{\text{em}} = 450$  nm; (b) F8BT,  $\lambda_{\text{em}} = 550$  nm; (c) MEH-PPV,  $\lambda_{\text{em}} = 600$  nm.



## CP film thickness dependence of the PL lifetime

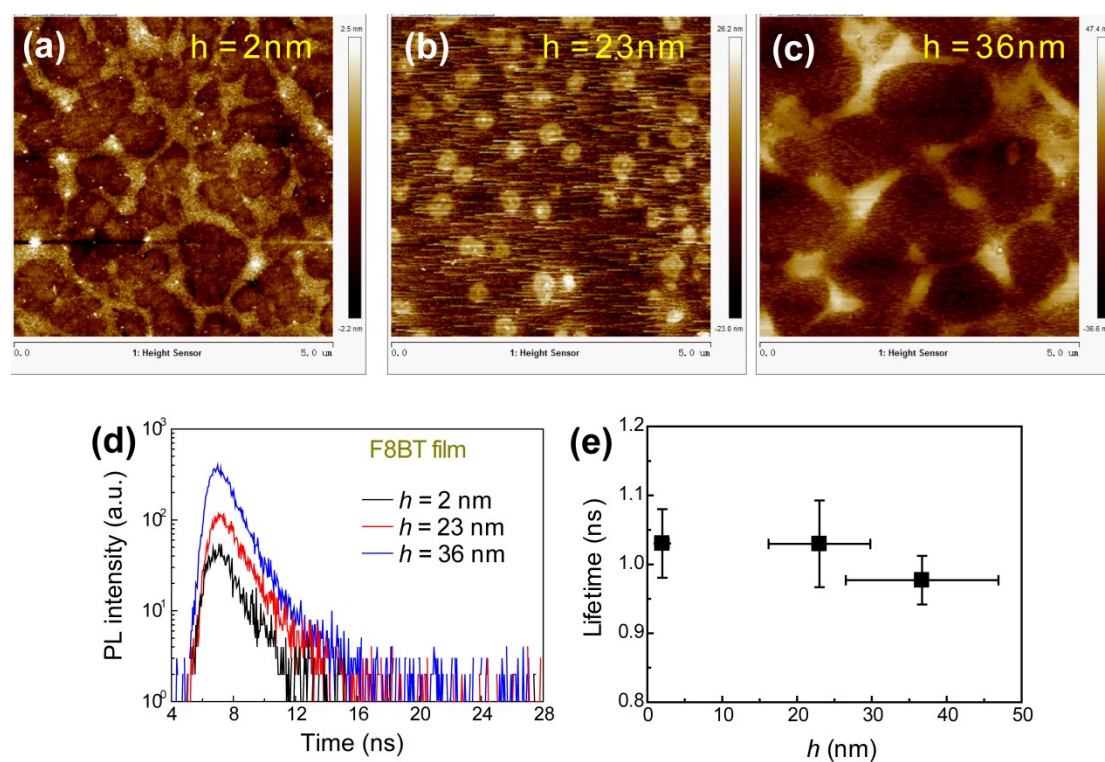

**Figure S8** (a-c) AFM images of the surface morphologies of spun F8BT films with various thickness,  $h$ . (a) 2 nm; (b) 23 nm; (c) 36 nm. (d) Transient PL decay curves of F8BT films with various thicknesses. (e) PL lifetime of F8BT films as a function of film thickness.

**Table S1** The CP film thickness dependence of PL lifetime.

|         | $h$ (nm)        | PL lifetime (ns) |
|---------|-----------------|------------------|
| PFO     | $3 \pm 0.6$     | $0.58 \pm 0.06$  |
|         | $15 \pm 3.8$    | $0.55 \pm 0.06$  |
|         | $39 \pm 9$      | $0.52 \pm 0.03$  |
| F8BT    | $2 \pm 0.8$     | $1.03 \pm 0.05$  |
|         | $23.0 \pm 6.79$ | $1.03 \pm 0.06$  |
|         | $36 \pm 10.2$   | $0.98 \pm 0.06$  |
| MEH-PPV | $20 \pm 1.3$    | $1.45 \pm 0.14$  |
|         | $25.8 \pm 5.3$  | $1.11 \pm 0.04$  |

**Table S2** Quenching distances reported for various CP based energy transfer system.

| Donor polymer | Quencher             | Quenching distance <sup>a</sup> (nm) | Ref       |
|---------------|----------------------|--------------------------------------|-----------|
| PFO           | PPV                  | 6.3                                  | [1]       |
| PFO           | hole                 | 2.7                                  | [2]       |
| PFO           | tetraphenylporphyrin | 4.2                                  | [3]       |
| PFO           | GND-Ag NPs           | 5.9-6.3                              | This work |
| F8BT          | F8TBT                | 5.32                                 | [4]       |
| F8BT          | MoO <sub>3</sub>     | 4.5                                  | [5]       |
| F8BT          | GND-Ag NPs           | 2.5-3.2                              | This work |
| MEH-PPV       | C <sub>61</sub> PCBM | 3.4                                  | [6]       |
| MEH-PPV       | GND-Ag NPs           | 8.3-11.6                             | This work |

<sup>a</sup>The quenching distance corresponds to the Förster radius ( $R_0$ ) calculated from FRET theory when the non-metal quencher is used, while corresponds to the characteristic distance  $d_0$  calculated from PRET theory using GND-Ag NPs as quencher in this work.

### Measurements of $(\text{PDDA/PSS})_n/\text{PDDA}$ spacer thickness

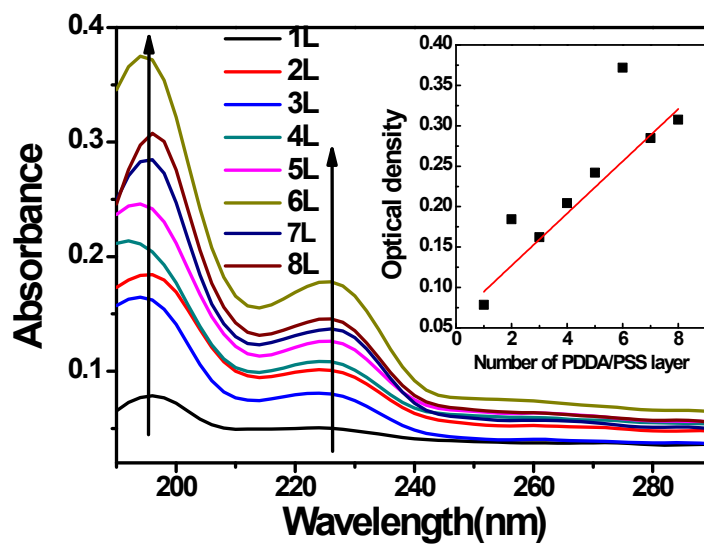

**Figure S9** Absorption spectra of assembled  $(\text{PDDA/PSS})_n/\text{PDDA}$  layer with the integer  $n = 0$  to  $8$ . Inset shows the optical density as a function of the number of PDDA/PSS layer monitored at 225 nm.

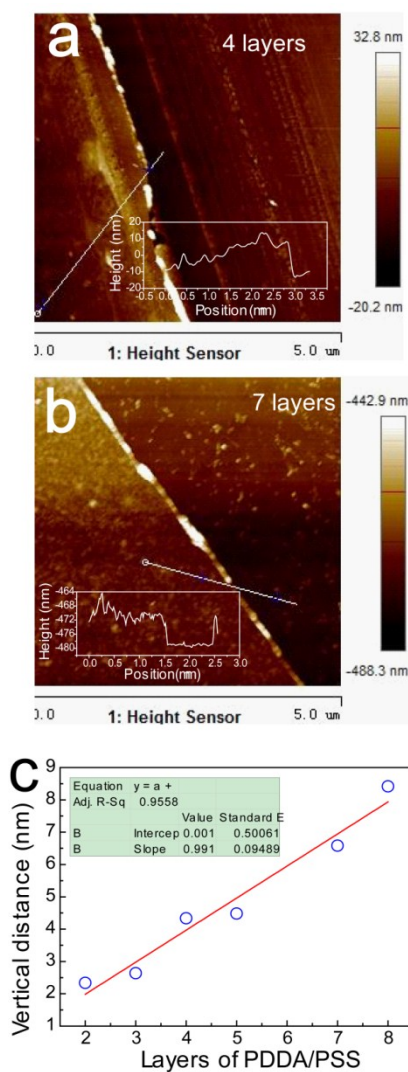

**Figure S10** The thickness of  $(\text{PDDA}/\text{PSS})_n/\text{PDDA}$  layer with the  $n = 0$  to 8 was measured using an AFM. The film was scratched with a wood stick and the step height along several scratches was measured. AFM images of scratch layer border with  $n = 4$  (a) and 7 (b) show above. (c) The measured thickness of self-assembled film as a function of number of layers. The red line represents the linear fit equation  $y = 0.99x$ , indicating a self-assembled layer is about 1 nm.

## Absorption spectra of the bilayer structure

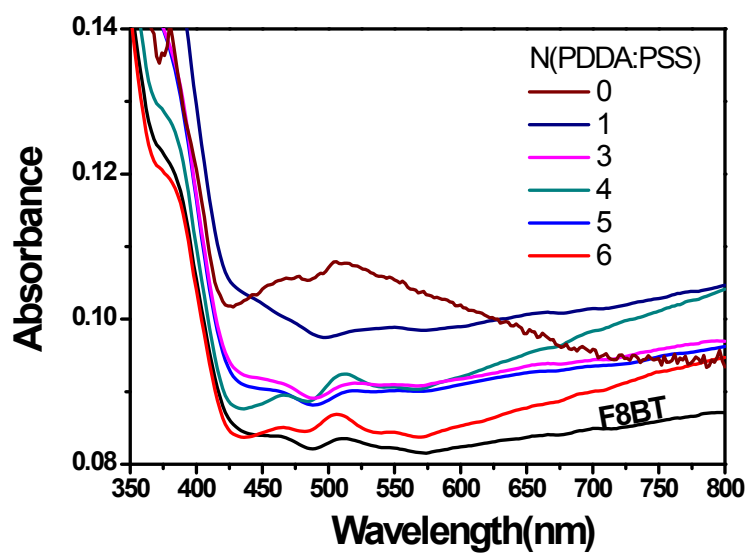

**Figure S11** Absorption spectra of the bilayer structure of GND-Ag NPs/[(PDDA/PSS)<sub>n</sub>/PDDA]/F8BT with the integer  $n = 0$  to 6, where the  $\Gamma$ -value was set to be  $4.4 \times 10^{-2} \text{ nm}^{-2}$  and the  $h_{\text{CP}}$  was 2 nm.

## Spacer thickness dependent transient PL spectra

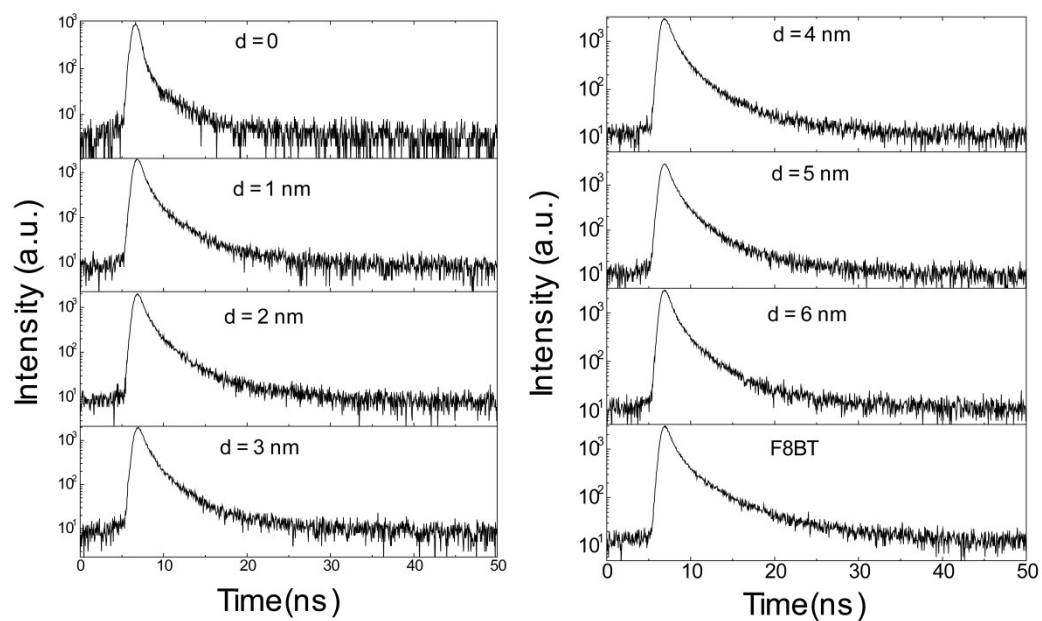

**Figure S12** Transient PL decay curves of the bilayer structure of GND-Ag NPs/[PDDA/PSS]<sub>n</sub>/PDDA/F8BT with the spacer thickness ranging from 0 to 6 nm, where the  $\Gamma$ -value was set to be  $4.4 \times 10^{-2} \text{ nm}^{-2}$  and the  $h$  was 2 nm.

## Photoelectrochemical study

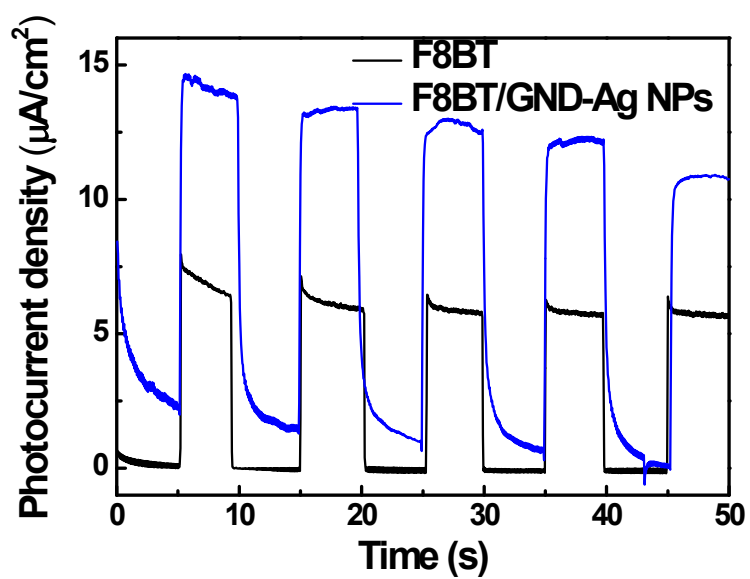

**Figure S13** Photocurrent density versus time curves of F8BT films on ITO (black) and GND-Ag NPs (blue) photoanodes in sat. KCl as reference electrode, Pt wire as counter electrode and the prepared films with an active area ca.  $0.12 \text{ cm}^2$  as working electrode. Light source: 300 W Xe lamp ( $100 \text{ mW}\cdot\text{cm}^{-2}$ ); Scanning rate:  $20 \text{ mV}\cdot\text{s}^{-1}$ .

## References:

1. Muhammad-Umair Hassaan, Yee-Chen Liu, Kamran-Ul Hasan, Mohsin Rafique, Ali-K Yetisen, Haider Butt, Richard-Henry Friend, Highly Efficient Energy Transfer in Light Emissive Poly(9,9-dioctylfluorene) and Poly(p-phenylenevinylene) Blend System. *ACS Photonics*, 2017, 5: 607-613.
2. Francisco Montilla, Arvydas Ruseckas, Ifor-D-W Samuel, Exciton - Polaron Interactions in Polyfluorene Films with  $\beta$ -Phase. *The Journal of Physical Chemistry C*, 2018, 122: 9766-9772.
3. G Cerullo, S Stagira, M Zavelani-Rossi, S De Silvestri, T Virgili, D-G Lidzey, D-D-C Bradley, Ultrafast Förster transfer dynamics in tetraphenylporphyrin doped poly(9,9-dioctylfluorene). *Chemical Physics Letters*, 2001, 335: 27-33.
4. Bo-Ram Lee, Wonho Lee, Thanh-Luan Nguyen, Ji-Sun Park, Ji-Seon Kim, Jin-Young Kim, Han-Young Woo, Myoung-Hoon Song, Highly Efficient Red-Emitting Hybrid Polymer Light-Emitting Diodes via Förster Resonance Energy Transfer Based on Homogeneous Polymer Blends with the Same Polyfluorene Backbone. *ACS Applied Materials & Interfaces*, 2013, 5: 5690-5695.
5. Aravindh Kumar, Amrita Dey, Anjali Dhir, Dinesh Kabra, Quantitative estimation of exciton quenching strength at interface of charge injection layers and organic semiconductor. *Organic Electronics*, 2017, 42: 28-33.
6. Alexander-J Ward, Arvydas Ruseckas, Ifor-D-W Samuel, A Shift from Diffusion Assisted to Energy Transfer Controlled Fluorescence Quenching in Polymer-Fullerene Photovoltaic Blends. *The Journal of Physical Chemistry C*, 2012, 116: 23931-23937.
